# Supplementary material
Source: PubMed Central journal article supplement (PMC2818194)

**A.**

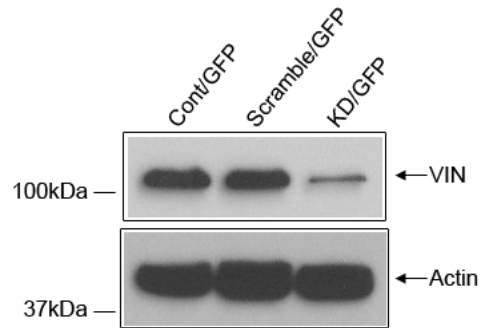

**B.**

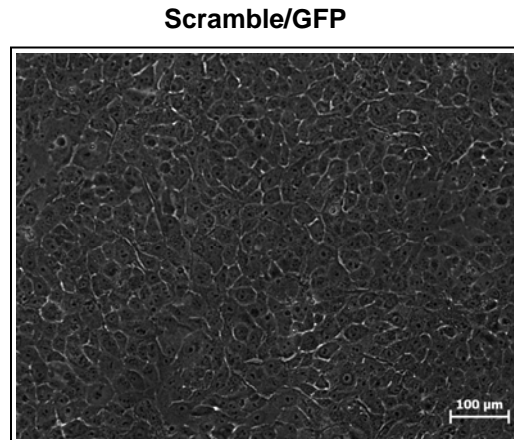

**C.**

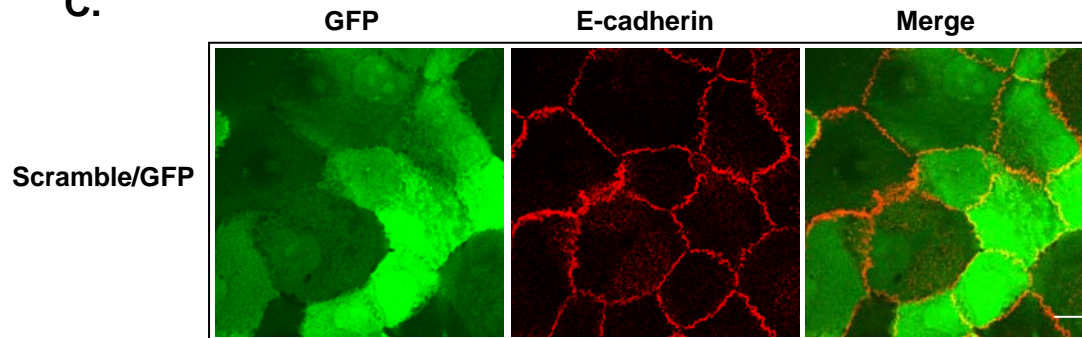

Supplement: supp_123_4_567__1.pdf [file supp_123_4_567__1.pdf]

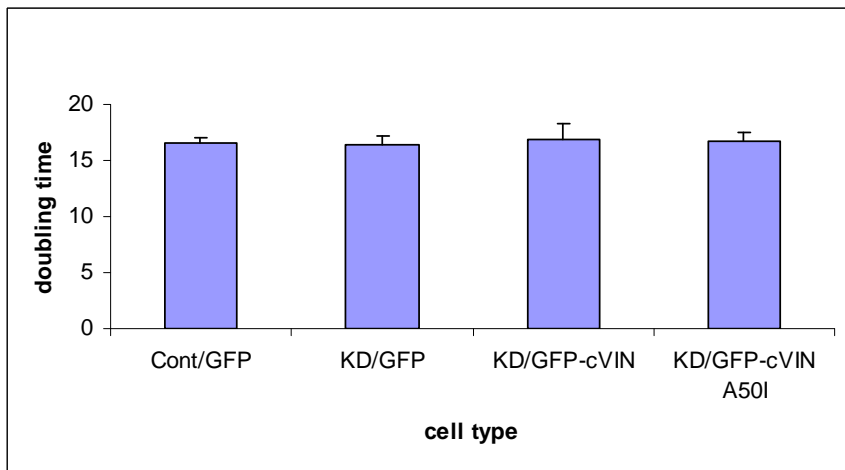

Supplement: supp_123_4_567__2.pdf [file supp_123_4_567__2.pdf]

**A.**

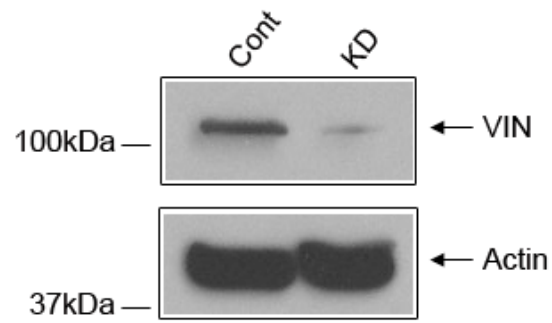

**B.**

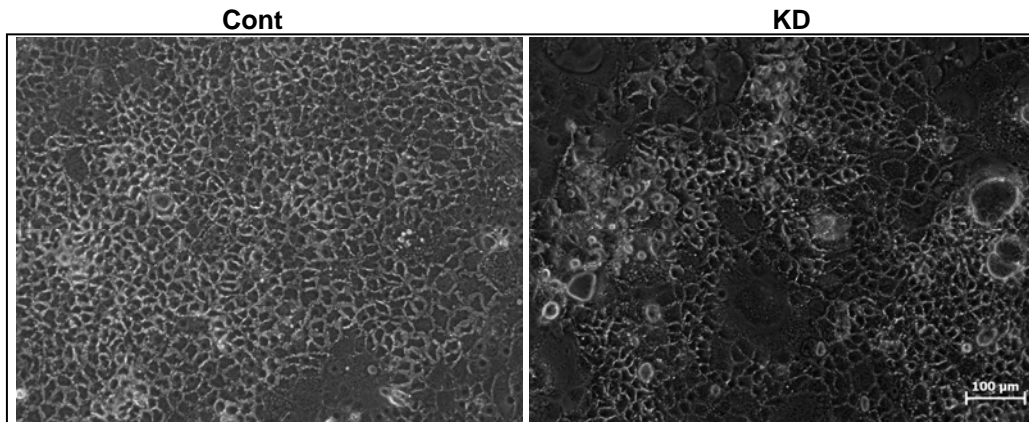

**C.**

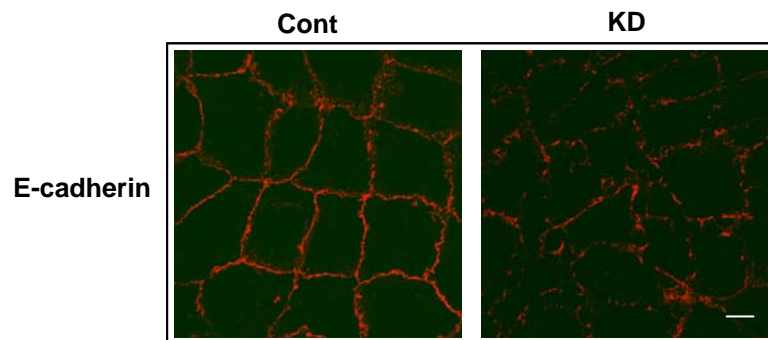

Supplement: supp_123_4_567__3.pdf [file supp_123_4_567__3.pdf]

**Cont/GFP**

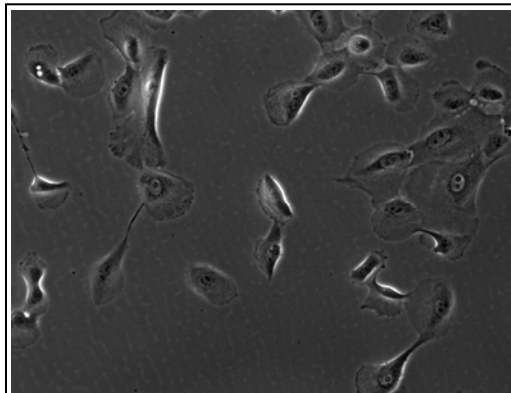

**KD/GFP**

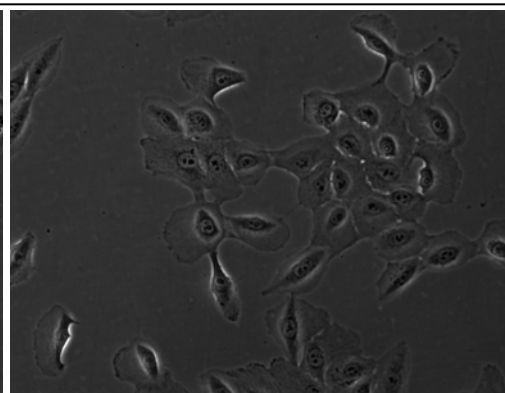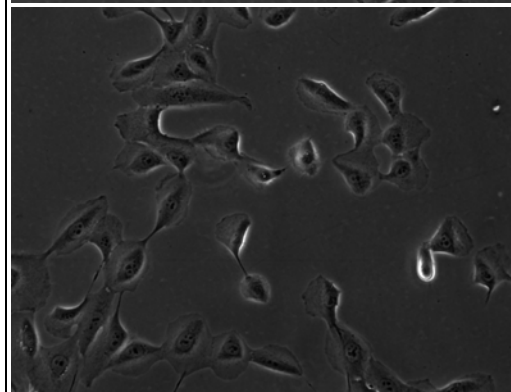

**KD/GFP-cVIN**

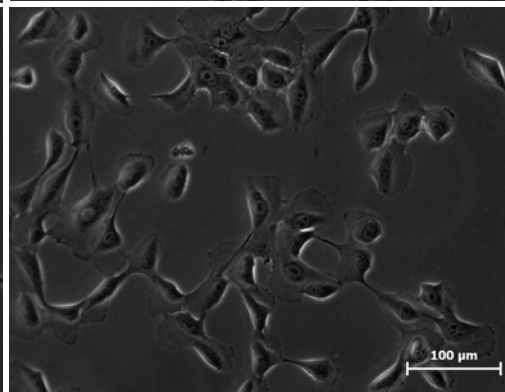

**KD/GFP-cVIN A501**

Supplement: supp_123_4_567__4.pdf [file supp_123_4_567__4.pdf]

**Cont/GFP**

**KD/GFP**

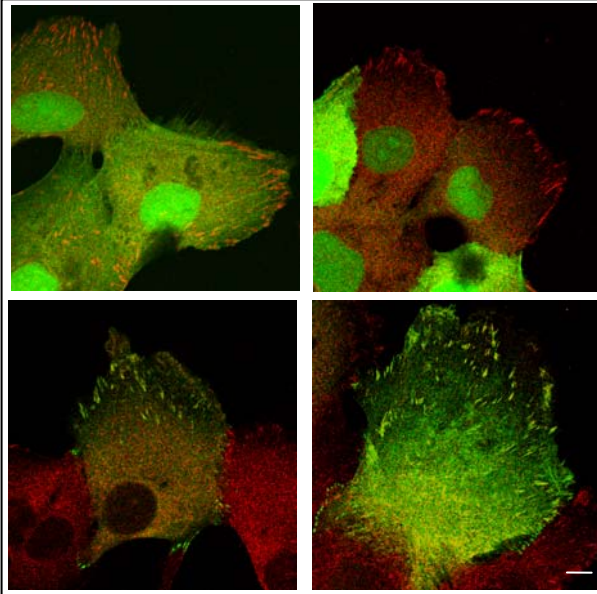

**KD/GFP-cVIN**

**KD/GFP-cVIN A50I**

Supplement: supp_123_4_567__5.pdf [file supp_123_4_567__5.pdf]

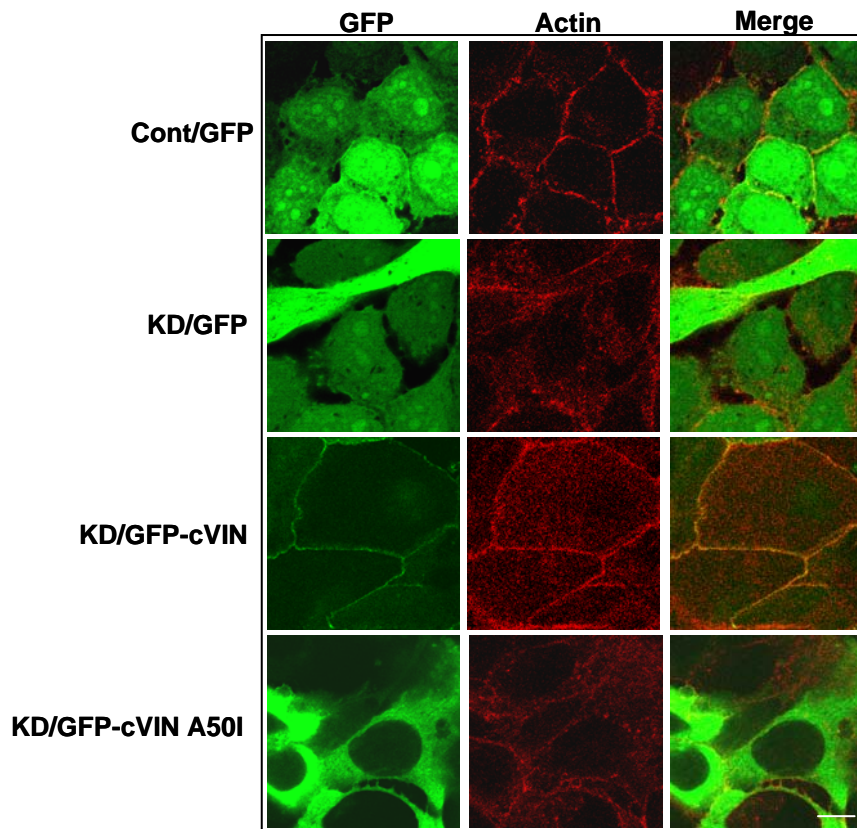

Supplement: supp_123_4_567__6.pdf [file supp_123_4_567__6.pdf]

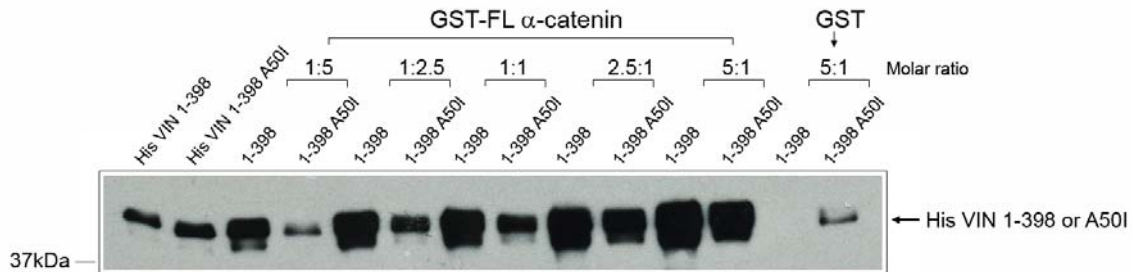

Supplement: supp_123_4_567__7.pdf [file supp_123_4_567__7.pdf]

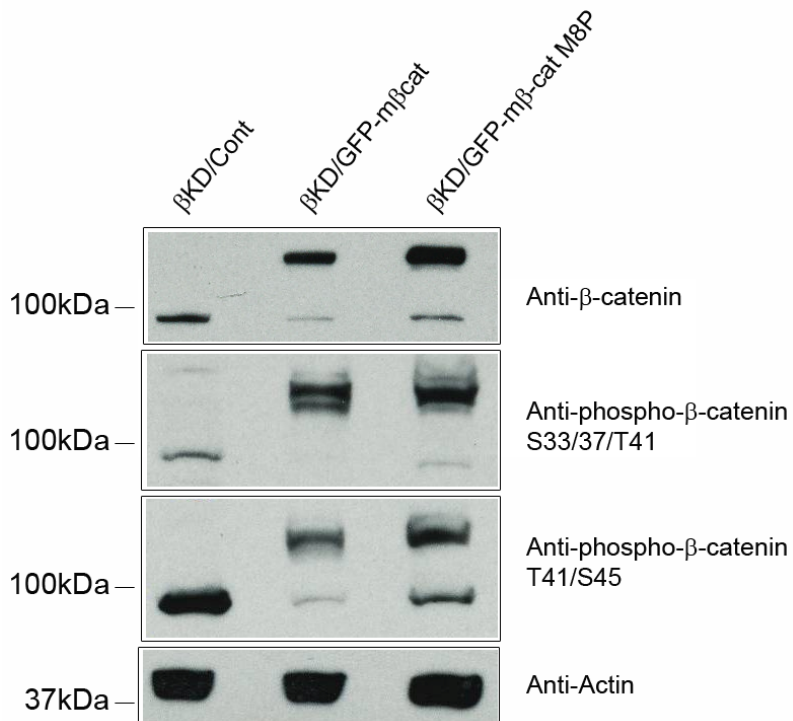

Supplement: supp_123_4_567__8.pdf [file supp_123_4_567__8.pdf]

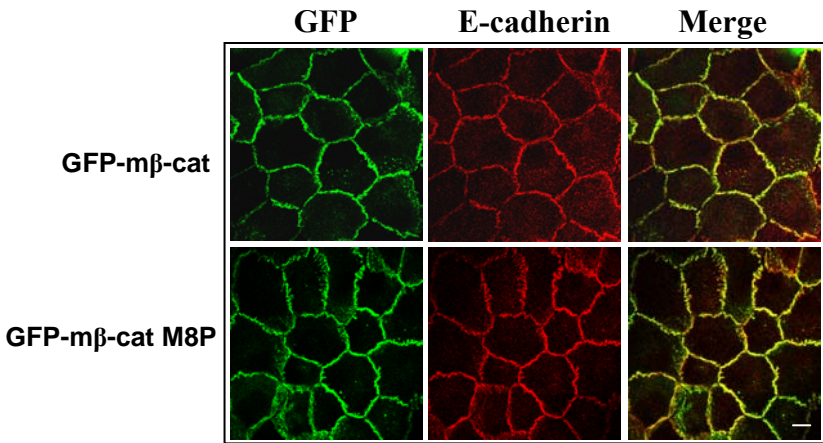

Supplement: supp_123_4_567__9.pdf [file supp_123_4_567__9.pdf]
